# Supplementary material for: Single-phase nickel-doped ceria cathode with in situ grown nickel nanocatalyst for direct high-temperature carbon dioxide electrolysis
Source: Royal Society of Chemistry journal article supplement (doi:10.1039/c4ra06712f), 2014-01-01
Supplement: c4ra06712f1.pdf [file c4ra06712f1.pdf]

## Single-phase nickel-doped ceria cathode with *in-situ* grown nickel nanocatalyst for direct high-temperature carbon dioxide electrolysis

Wentao Qi<sup>a</sup>, Kui Xie<sup>a, b \*</sup>, Min Liu<sup>a</sup>, Guojian Wu<sup>a</sup>, Yan Wang<sup>a</sup>, Yong Zhang<sup>a</sup>, Yucheng Wu<sup>a, b \*</sup>

<sup>a</sup>Key Laboratory of Advanced Functional Materials and Devices of Anhui Province & School of Materials Science and Engineering, Hefei University of Technology, No.193 Tunxi Road, Hefei, Anhui 230009, China. Email: xiekui@hfut.edu.cn.

<sup>b</sup>Hefei National Laboratory for Physical Sciences at the Microscale & Department of Chemistry, University of Science and Technology of China, No.96 Jinzhai Road, Hefei, Anhui 230026, China

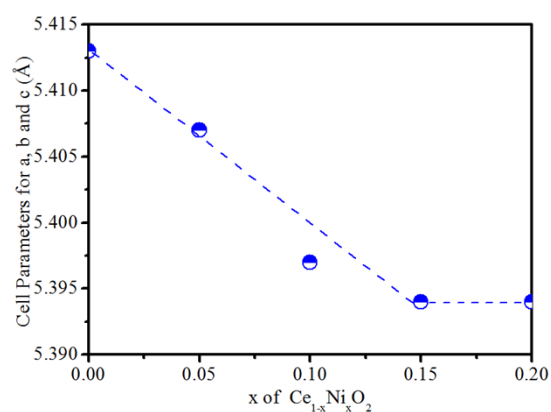

Fig. S1: The cell parameters of the oxidized Ce<sub>1-x</sub>Ni<sub>x</sub>O<sub>2</sub> powder samples with x=0, 0.05, 0.10, 0.15 and 0.20.

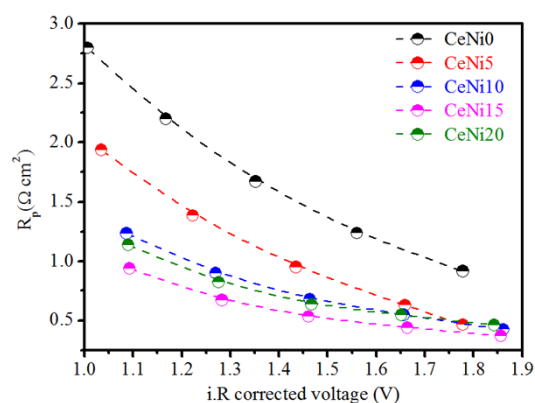

Fig. S2:  $R_p$  versus i.R corrected voltage of the electrolyzers tested in pure carbon dioxide at 800 °C.
